1 **A heme-binding protein produced by *Haemophilus haemolyticus* inhibits non-**  
2 **typeable *Haemophilus influenzae***

3  
4 Roger D. Latham <sup>1</sup>, Mario Torrado <sup>2</sup>, Brianna Atto <sup>3</sup>, James L. Walshe <sup>2</sup>, Richard Wilson <sup>4</sup>, J.  
5 Mitchell Guss <sup>2</sup>, Joel P. Mackay <sup>2</sup>, Stephen Tristram <sup>3</sup>, David A. Gell <sup>1</sup>

6  
7 <sup>1</sup> School of Medicine, University of Tasmania

8 <sup>2</sup> School of Life and Environmental Sciences, University of Sydney

9 <sup>3</sup> School of Health Sciences, University of Tasmania

10 <sup>4</sup> Central Science Laboratory, University of Tasmania

11  
12 Correspondence and requests for materials should be addressed to DAG ([david.gell@utas.edu.au](mailto:david.gell@utas.edu.au))  
13 or ST ([Stephen.Tristram@utas.edu.au](mailto:Stephen.Tristram@utas.edu.au))

14  
15 **Keywords:** *Haemophilus haemolyticus*, non-typeable *Haemophilus influenzae* (NTHi), hemophore,  
16 hemophilin

17

18 **Abstract**

19 Many commensal bacteria and opportunistic pathogens scavenge heme from their environment.  
20 Pathogens and host are engaged in an arms race to control access to heme, but similar conflicts  
21 between bacterial species that might regulate pathogen colonisation are largely unknown. We show  
22 here that a commensal bacterium, *Haemophilus haemolyticus*, makes hemophilin, a heme-binding  
23 protein that not only allows the bacterium to effectively scavenge heme for its own growth, but also  
24 inhibits co-culture of the opportunistic pathogen, non-typeable *Haemophilus influenzae* (NTHi), by  
25 heme starvation. Knockout of the hemophilin gene abrogates the ability of *H. haemolyticus* to  
26 inhibit NTHi and an x-ray crystal structure shows that hemophilin has a previously unreported  
27 heme-binding structure. The bound heme molecule is deeply buried and the heme iron atom is  
28 coordinated through a single histidine side chain. Biochemical characterization shows that this  
29 arrangement allows heme to be captured in the ferrous or ferric state, and with small ferrous or  
30 ferric heme-ligands bound, suggesting hemophilin could function over in a wide range of  
31 physiological conditions. Our data raise the possibility that competition for heme between  
32 commensal and pathogenic bacteria can influence bacterial colonisation, and therefore disease  
33 likelihood, and suggest that strains of *H. haemolyticus* that overproduce hemophilin might have  
34 therapeutic uses in reducing colonisation and subsequent opportunistic infection by NTHi.

35

## 36 **Introduction**

37 Non-typeable *Haemophilus influenzae* (NTHi) are Gram-negative bacteria with their reservoir in  
38 the upper respiratory tract of humans. Although frequent colonizers of healthy children and adults  
39 (Lemon et al., 2010), NTHi have replaced *H. influenzae* capsular type b (Hib) as the leading cause  
40 of invasive infections for this species (Van Eldere et al., 2014), and are also an important cause of  
41 non-invasive disease, such as recurrent otitis media (Ngo et al., 2016) and exacerbations of chronic  
42 obstructive pulmonary disease (Sethi and Murphy, 2008).

43  
44 The management of NTHi infections is becoming increasingly difficult. The intrinsic heterogeneity  
45 of NTHi has hampered vaccine development, and despite significant effort, an effective vaccine is  
46 not currently available (Cerquetti and Giufre, 2016). There has been an increase in both the  
47 incidence and spectrum of antimicrobial resistance in NTHi (Tristram et al., 2007) and the  
48 development of new antibiotics for NTHi has recently been listed as a priority by the World Health  
49 Organisation, emphasising the need for new approaches to the prevention and management.

50  
51 As an alternative to antibiotics, bacteriocin-producing strains of upper respiratory tract commensal  
52 streptococci have been commercialized as probiotics to prevent and treat *S. pyogenes* infections (Di  
53 Pierro et al., 2016), and, more recently, bacteriocin-producing strains of *Staphylococcus*  
54 *lugdunensis* were shown to be associated with reduced nasal carriage of *S. aureus* (Zipperer et al.,  
55 2016). In light of these studies, we considered that certain commensal *Haemophilus* spp. might have  
56 potential as probiotics to counter NTHi infection. *Haemophilus haemolyticus* are bacteria that are  
57 resident in the upper respiratory tract of healthy adults and children at sites that are also colonised  
58 by NTHi. *H. haemolyticus* is genetically and phenotypically closely related to NTHi, with both  
59 requiring heme and NAD for growth. However, unlike NTHi, *H. haemolyticus* is not considered to  
60 be a pathogen (Murphy et al., 2007; Zhang et al., 2014).

61  
62 Recently, with the purpose of developing strains of *H. haemolyticus* as respiratory tract probiotics,  
63 we performed a screen of 100 *H. haemolyticus* isolates and found that the isolate BW1 produced a  
64 compound capable of inhibiting the growth of NTHi *in vitro* (Latham et al., 2017). Here, we show  
65 that the NTHi inhibitory factor is a heme binding protein, which we have named hemophilin. An x-  
66 ray crystal structure shows that hemophilin has a previously undescribed heme-binding fold.  
67 Recombinant hemophilin, and a hemophilin gene knockout in *H. haemolyticus*, demonstrate that  
68 hemophilin is sufficient and necessary for NTHi inhibition *in vitro*. Together, the results presented

69 below suggest that hemophilin has an important role in heme uptake by *H. haemolyticus*, and that  
70 growth-inhibition of competing NTHi occurs by heme starvation.

71  
72

## 73 **Results**

### 74 **Identification of the hemophilin gene from two *Haemophilus haemolyticus* clinical isolates**

75 We previously showed that an NTHi-inhibitory protein was produced by *H. haemolyticus* isolate  
76 BW1 (Latham et al., 2017). Further screening identified a second *H. haemolyticus* isolate, RHH122,  
77 with similar activity (Supplementary Figs. 1 and 2). To identify the NTHi-inhibitory protein, which  
78 we now call hemophilin, conditioned growth medium from stationary phase cultures of BW1 and  
79 RHH122 was fractionated by ammonium sulfate precipitation, size exclusion chromatography  
80 (SEC) and reversed-phase HPLC (RP-HPLC). Identical (mock) separation steps were performed for  
81 two control *H. haemolyticus* isolates (BW39 and BWOCT3) that lacked NTHi-inhibitory activity.  
82 For BW1 and RHH122 samples, RP-HPLC peaks containing NTHi-inhibitory activity eluted at the  
83 same retention time, and these peaks were absent from BW29 and BWOCT3 samples (Fig. 1A).  
84 SDS-PAGE and silver staining revealed one predominant polypeptide of ~30 kDa in the active  
85 fractions from BW1 and RHH122 (Fig. 1B and Supplementary Fig. 2), which was identified as a  
86 hypothetical protein (GenBank accession EGT80255) from *H. haemolyticus* strain M19107 by mass  
87 spectrometry and peptide mass fingerprint analysis (Fig. 1C). Peptide mass fingerprint analysis of  
88 whole RP-HPLC fractions identified EGT80255 peptides as the most abundant ions in samples with  
89 NTHi-inhibitory activity obtained from BW1 and RHH122, whereas MS analysis of matched RP-  
90 HPLC fractions from control strains, BW29 and BWOCT3, did not identify EGT80255 peptides  
91 above background (normalised intensity < 1%; Supplementary Table 1). Notably, no peptides  
92 corresponding to the first 22 amino acids of EGT80255 were identified, suggesting that a predicted  
93 signal peptide (Fig. 1C, blue) had been cleaved to release the mature hemophilin protein into the *H.*  
94 *haemolyticus* growth medium.

95

96 PCR-based sequencing of the hemophilin gene loci from BW1 and RHH122 genomic DNA  
97 confirmed the presence of ORFs that were identical to EGT80255. We cloned the hemophilin ORF  
98 from BW1 and expressed the mature form (residues 23–272, without the N-terminal signal peptide),  
99 in *E. coli*. Purified recombinant hemophilin displayed NTHi-inhibitory activity at micromolar  
100 concentrations (Fig. 1D). To show that hemophilin is the NTHi-inhibitory activity in *H.*  
101 *haemolyticus*, we generated a hemophilin gene knockout mutant of *H. haemolyticus* BW1 by

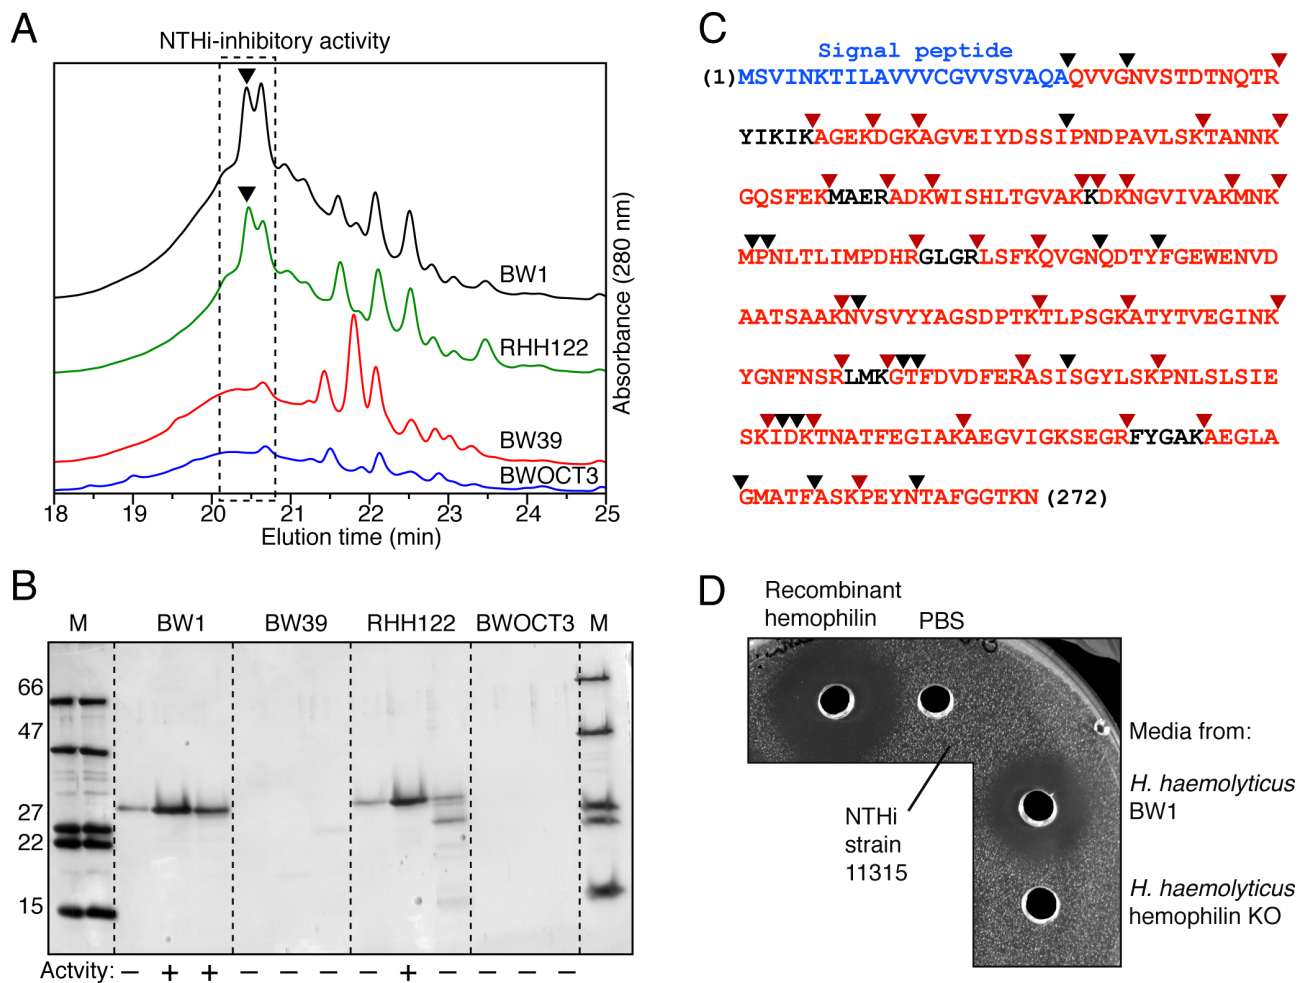

102

103

104

105

106

107

108

109

110

111

112

113

**Fig. 1 Hemophilin is a 27-kDa protein isolated from *H. haemolyticus* that inhibits the growth of NTHi.**  
**(A)** RP-HPLC profiles show that NTHi-inhibitory activity (filled triangles) coincided with elution peaks that were present in BW1 and RHH122 samples and absent from control strains BW39 and BWOCT3. **(B)** Tris-tricine SDS-PAGE and silver staining of RP-HPLC fractions indicated by a dashed box in A. Markers (M; kDa); activity (+/-) from NTHi inhibition assay. **(C)** Tryptic peptides of hemophilin matching 92% of the sequence (red) for hypothetical protein EGT80255 were identified by MS; trypsin cleavage (red triangles) and other fragmentation sites (black triangles) are indicated. No peptides were matched to a putative signal peptide (blue). **(D)** Agar well diffusion assay. Activity obtained from: recombinant hemophilin (400 pmole; 20  $\mu$ M); phosphate buffered saline (PBS); 1 mL of *H. haemolyticus* BW1 culture ( $OD_{600} = 0.88$ ); 1 mL of *H. haemolyticus* hemophilin knockout mutant culture ( $OD_{600} = 1.1$ ). The indicator strain is NTHi 11315.

114 insertional inactivation with a kanamycin resistance cassette. Media recovered from cultures of the  
115 knockout strain displayed no inhibitory activity against NTHi (Supplementary Fig. 3). Growth  
116 medium recovered from BW1 or the BW1 hemophilin gene knockout contained similar protein  
117 content overall, as judged by chromatographic separations and silver staining, with the notable  
118 exception that the hemophilin protein band was absent from the knockout samples (Supplementary  
119 Fig. 3). In summary, these results show that hemophilin is the NTHi-inhibitory protein from *H.*  
120 *haemolyticus* isolates BW1 and RHH122.

121

## 122 **Hemophilin is a heme binding protein**

123 The UV-visible absorption spectrum of the hemophilin had strong absorption bands at 415 nm, 540  
124 nm and 575 nm, which are characteristic of the Soret and  $\alpha/\beta$  bands of a hemoprotein (Fig. 2A, red  
125 trace). The presence of non-covalently bound heme *b* was confirmed by RP-HPLC and mass  
126 spectrometry (Fig. 2B). Apo hemophilin (hemophilin with the heme group removed) was able to  
127 bind reduced ferrous heme or oxidised ferric heme, and the reconstituted holo proteins were  
128 competent to bind to a variety of small ligands that are specific for ferrous ( $O_2$ , CO; Supplementary  
129 Fig. 4) or ferric ( $CN^-$ ,  $HS^-$ ; Supplementary Fig. 5) hemes. The UV-visible spectrum of apo  
130 hemophilin (Fig. 2A, black trace) reconstituted with ferrous heme and  $O_2$  (Fig. 2A, green) is  
131 essentially identical to that of hemophilin purified from *E. coli* as the holo protein (Fig. 2A, red),  
132 suggesting that the *E. coli* derived protein is the  $O_2$ -bound form.

133

134 The holo and apo hemophilin fractions gave very similar far-UV CD spectra, with maxima at ~200  
135 nm and minima between 220–230 nm, indicating a mixture of  $\beta$ -sheet and  $\alpha$ -helical secondary  
136 structure elements, and no major change in secondary structure upon heme binding (Fig. 2C). This  
137 is unlike hemoglobins or heme-binding enzymes, which typically undergo at least partial  
138 denaturation in the absence of the heme cofactor, and is more similar to the apo state characteristics  
139 of transient heme binding proteins, such as heme transport proteins, which essentially have folded  
140 apo protein structures (Smith et al., 2010). In addition, the hemophilin apo protein displayed NTHi-  
141 inhibitory activity that was typically 3–4 fold higher than that of the holo protein (Fig. 2D). The  
142 structure and activity of apo hemophilin suggest that reversible binding to heme is likely to be a  
143 function of this protein.

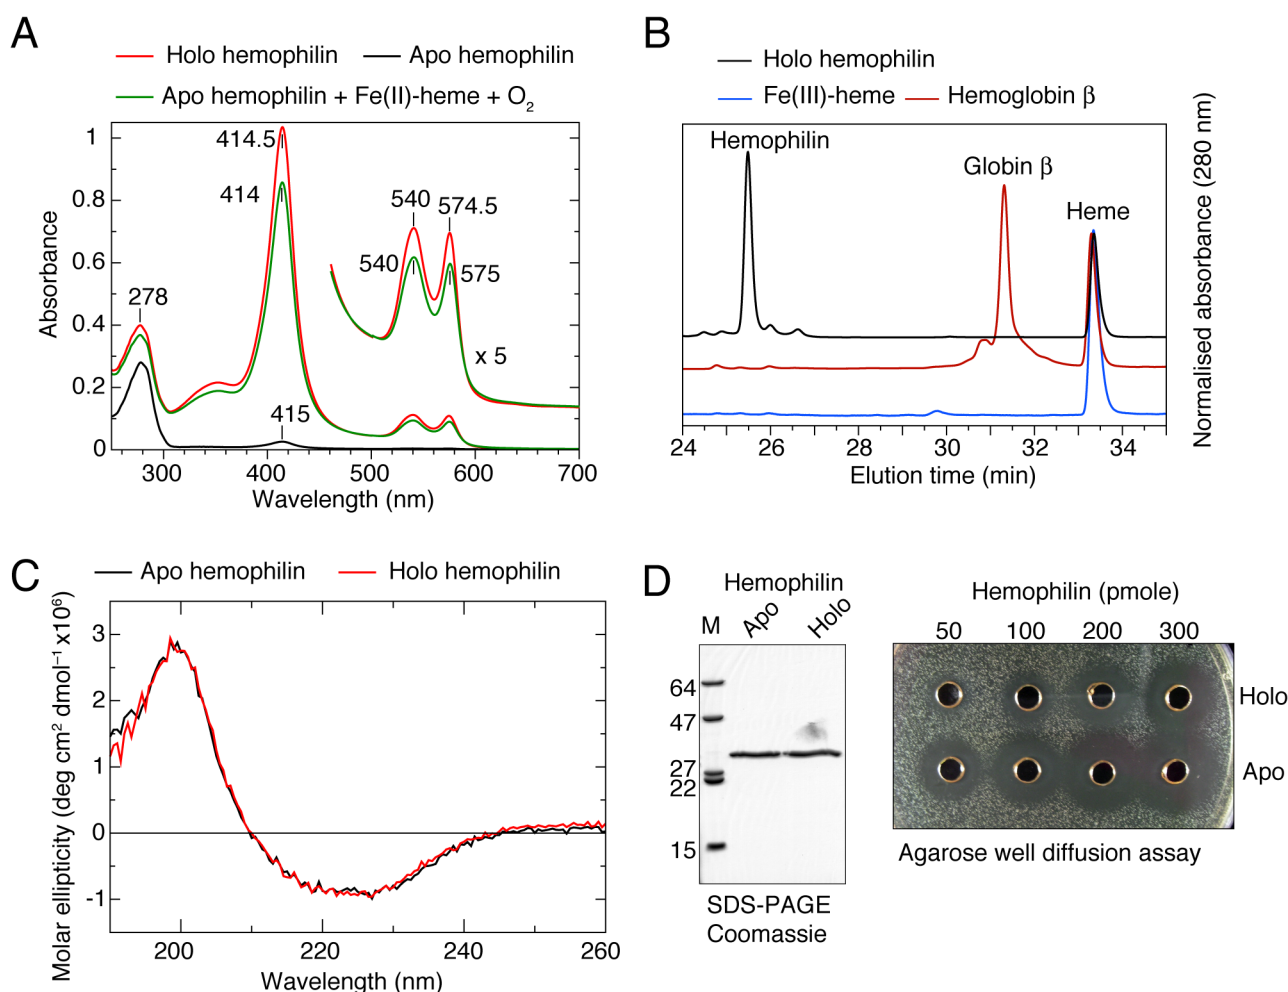

144

145

146

147

148

149

150

151

152

### 153 Hemophilin has a novel heme binding structure

154

155

156

157

158

159

160

**Fig. 2. Hemophilin is a heme-binding protein.** (A) UV-visible absorption spectra of recombinant holo (red) and apo hemophilin (black). Addition of ferrous heme and O<sub>2</sub> to apo hemophilin yields a spectrum (green) essentially identical to that of holo hemophilin. (B) RP-HPLC shows heme is non-covalently bound to hemophilin; the retention time for the dissociated prosthetic group is identical to that of heme dissociated from human hemoglobin  $\beta$  chain, or purified heme. (C) CD spectra of holo and apo hemophilin (25 mM sodium phosphate, 125 mM NaF, pH 7.1) are highly similar, suggesting no large change in secondary structure upon heme binding. (D) Apo hemophilin has greater NTHi-inhibitory activity than the holo protein.

Hemophilin was crystallized and the structure determined by x-ray diffraction to a resolution of 1.6 Å (Supplementary Table 2). Initial phases were obtained by single wavelength anomalous diffraction (SAD) from the heme iron, above the absorption K-edge. All residues of hemophilin (23–272) are visible in the electron density. The hemophilin structure comprises an N-terminal region with mixed  $\alpha/\beta$  secondary structure (Fig. 3, blue–green) that binds a single heme molecule (Fig. 3A, grey sticks and orange sphere), and a C-terminal 8-stranded  $\beta$ -barrel (Fig. 3, yellow–red). Helix and loop insertions between the  $\beta$ -3 and  $\beta$ -4 strands, and between the  $\beta$ -5 and  $\beta$ -6 strands,

161 cover both faces of the porphyrin ring and provide the majority of protein-heme contacts. The DALI  
162 server shows that several bacterial proteins have structural similarity to hemophilin (Supplementary  
163 Fig. 6). Notably, all are cell-surface proteins with ligand binding functions (Supplementary Fig. 7),  
164 found in *Neisseriaceae* and some members of the *Pasteurellaceae*, but none have heme binding  
165 function or structural similarity within the hemophilin heme-binding site. No heme-binding domain  
166 with similarity to hemophilin could be detected by structure- or sequence-based searches.  
167

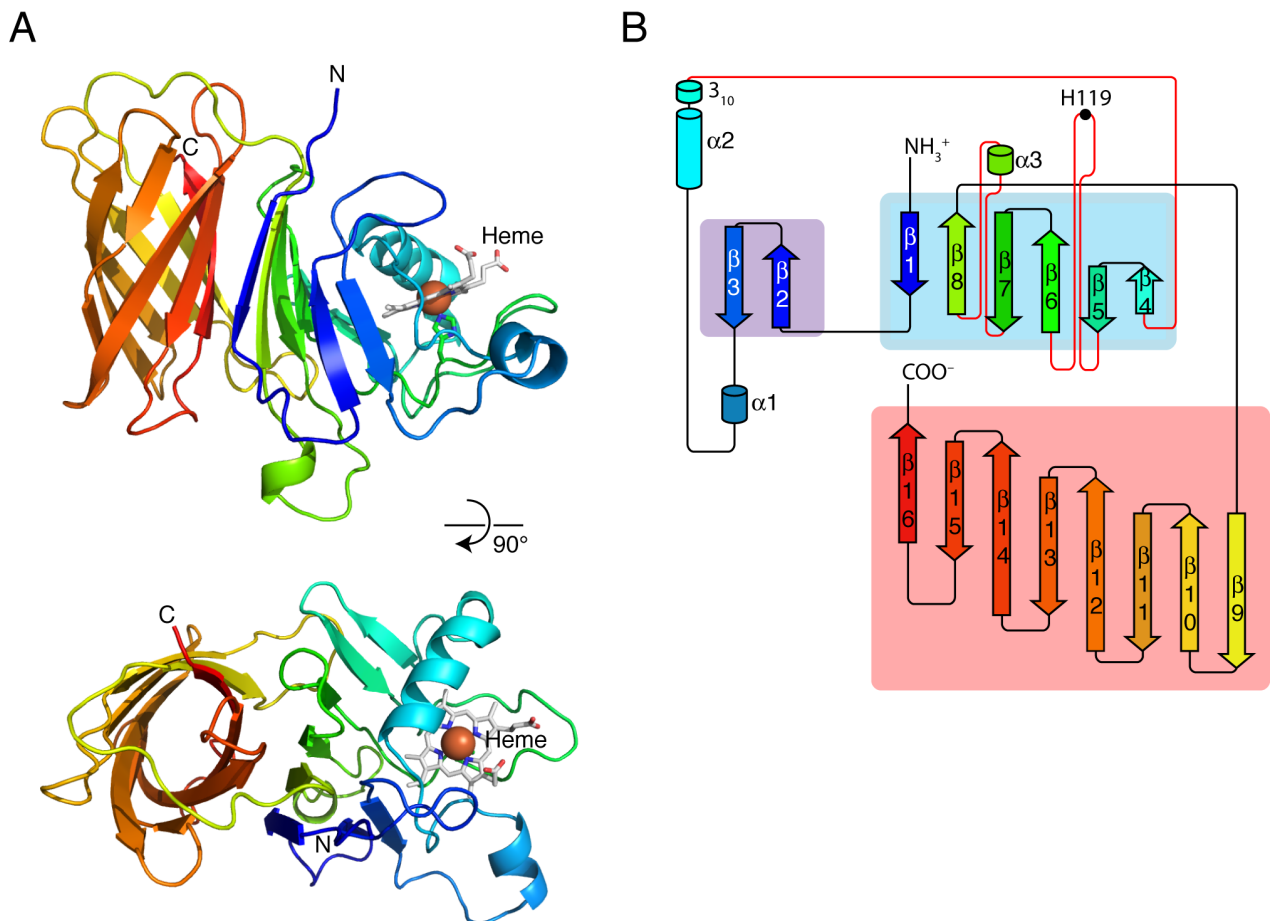

168  
169 **Fig. 3. Hemophilin is a new heme-binding fold.** (A) Richardson diagrams of the hemophilin crystal  
170 structure in two orthogonal views. (B) Topology diagram of hemophilin prepared based on the output from  
171 PROORIGAMI (Stivala et al., 2011).  
172

173 In the hemophilin crystal structure, a heme molecule and a small exogenous heme ligand are clearly  
174 visible in electron difference density OMIT maps (Fig. 4A; electron difference density maps from  
175 the early stages of structure refinement using a model comprising only the hemophilin polypeptide  
176 are shown in Supplementary Fig. 8). Electron density and an anomalous diffraction peak at the  
177 ligand position indicated a single heavy atom, which was modelled as a chloride ion (Fig. 4A). The



178 recombinant hemophilin protein used for crystallization was predominantly ferrous O<sub>2</sub> complex but  
179 contained some ferric protein (Supplementary Fig. 9), and the crystallization conditions (pH 4.5)  
180 favoured further heme oxidation (Supplementary Fig. 10), which would allow chloride binding  
181 (Supplementary Figure 11 shows that ferric hemophilin has a  $K_d$  of ~3 mM for chloride binding;  
182 chloride concentration in the crystallization drop was estimated to be 35–70 mM). The chloride  
183 refined at full occupancy and *B*-factors were consistent with those of the iron and other surrounding  
184 atoms. The Fe–Cl bond length in the hemophilin structure is 2.47(8) Å, which is in the range  
185 observed for Fe–Cl distances in heme protein structures (Kuwada et al., 2011; Singh et al., 2012;  
186 Kumar et al., 2013) (Supplementary Fig. 12; Supplementary Table 3).

187

188 The heme iron in hemophilin is coordinated in one axial position by the Nε2 atom of His119. The  
189 His119 side chain also makes a hydrogen bond through Nδ1 to the backbone carbonyl of Pro117  
190 and is surrounded by a hydrophobic cage comprising Ala69, Met106, Met109, Met116, Pro117,  
191 Leu122 side chains (Fig. 4B) that shields one face of the porphyrin and the Fe–Nε bond from water,  
192 providing a similar physicochemical environment to that of the proximal His in metazoan  
193 hemoglobins. His119 and all its caging residues, bar Ala69, lie on the protein loop between β  
194 strands 5 and 6 that extends across one face of the heme group (Fig. 4C); a conformational change  
195 in this loop could, therefore, be a possible mechanism to achieve heme entry and exit—solution  
196 state studies will be required to address this. The heme Fe atom sits in the plane of the porphyrin—  
197 0.04(8) Å from the least squares plane defined by the pyrrole N atoms—consistent with a 6-  
198 coordinate octahedral geometry. The side chain of Arg82 extends across the distal face of the  
199 porphyrin with the guanidinium group making cation-π and π-π interactions (Kumar et al., 2018)  
200 with the porphyrin, and hydrogen bonding interactions with the heme ligand and the porphyrin 17-  
201 propionate (Fig. 4B); a similar Arg conformation is seen in other heme protein structures with  
202 chloride ligands (Supplementary Fig. 12). The heme is oriented with the iron atom and porphyrin  
203 ring almost completely buried (solvent accessible non-polar area of 47 Å<sup>2</sup>, compared to 688 Å<sup>2</sup> for  
204 free heme) and the ionisable propionate groups pointing out into solvent (Fig. 4D).

205

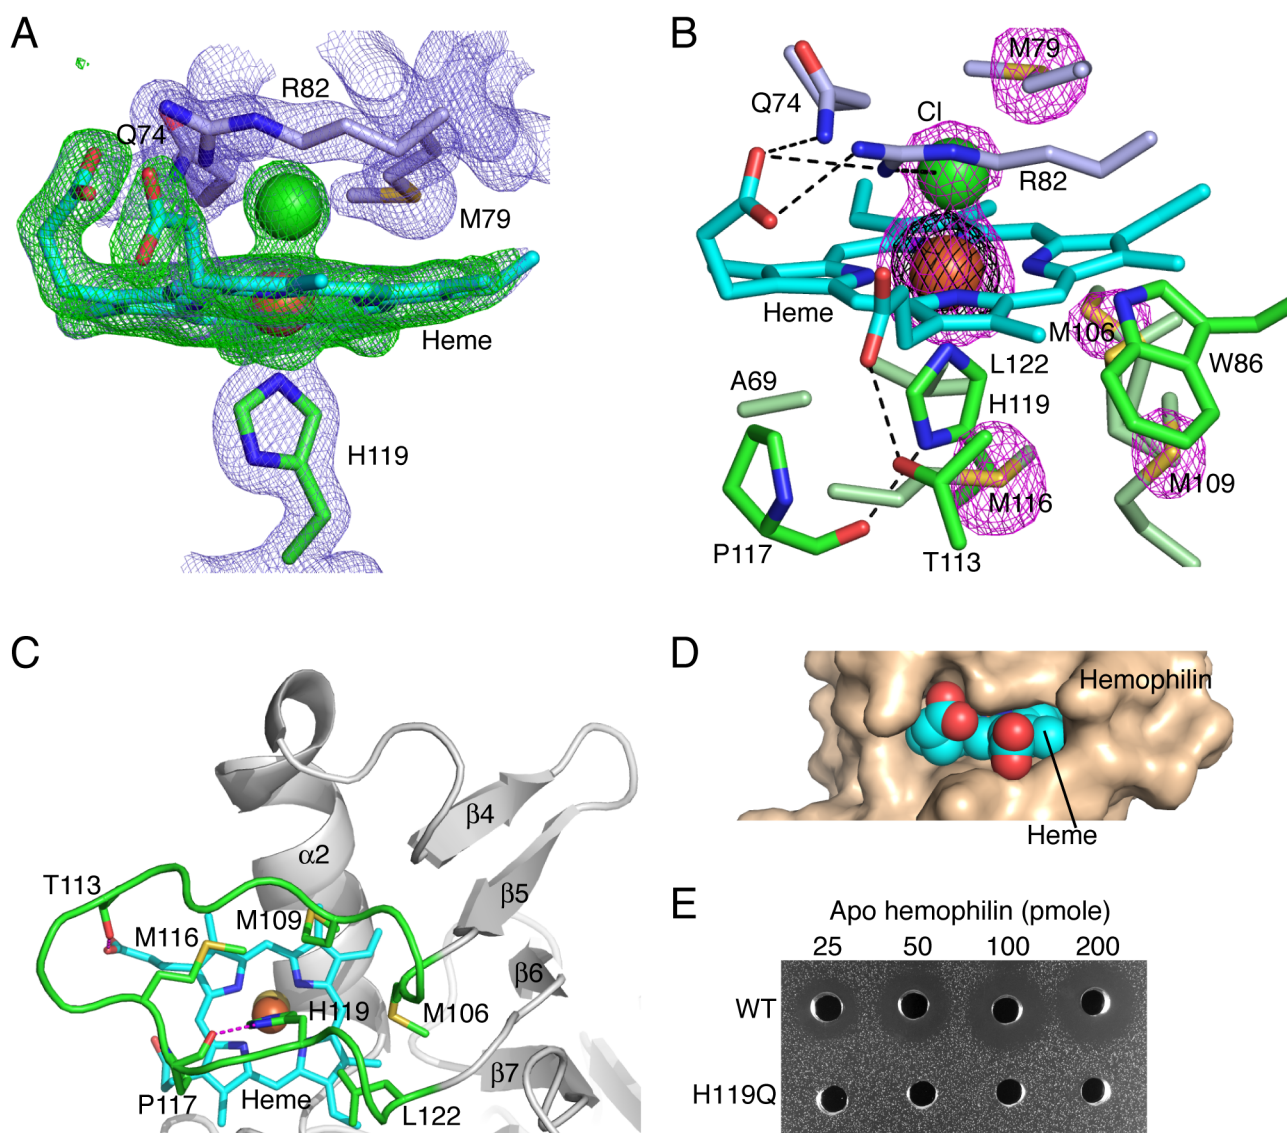

206

207

208 **Fig. 4. Features of the hemophilin heme pocket.** (A) Figure shows  $2F_o - F_c$  electron density map  
 209 (contoured at  $2\sigma$ ; blue mesh) and  $F_o - F_c$  OMIT map (contoured at  $4\sigma$ ; refined without the heme and heme  
 210 ligand; green mesh). (B) Protein side chains make extensive contacts with both faces of the porphyrin (cyan  
 211 sticks). Anomalous diffraction map contoured at  $25\sigma$  (black mesh) identifies the position of the heme iron  
 212 atom (orange sphere), and contoured at  $5\sigma$  (pink mesh) identifies sulfur atoms (yellow) of methionines,  
 213 and a chloride ion (green sphere). (C) All the molecular contacts between hemophilin and the H119-proximal  
 214 side of the heme are provided by a single protein loop (green). (D) The heme group (spheres) is buried  
 215 with the central iron obscured. (E) Mutation of the heme-coordinating histidine (H119Q) leads to loss of NTHi-  
 216 inhibitory activity.

217

218 To investigate whether the heme binding function of hemophilin is required for NTHi-inhibitory  
219 activity, we made a His to Gln substitution of the heme-coordinating His119 (H119Q). Unlike wild-  
220 type hemophilin, the H119Q mutant protein purified from *E. coli* without a heme cofactor,  
221 indicating a large reduction in heme binding affinity (Supplementary Fig. 13). Mixing heme with  
222 the H119Q mutant gave a spectrum with peaks at 404, 485 and 602 nm, similar to spectra of ferric  
223 heme:protein complexes without an Fe-coordinating side chain (Gao et al., 2018), suggesting that  
224 the H119Q mutant binds heme, but probably does not form an axial bond to the iron. The H119Q  
225 mutant was not inhibitory to NTHi at the concentrations tested (Fig. 4E and Supplementary Fig. 13),  
226 indicating that heme coordination through H119 contributes substantially to NTHi inhibition.

227

### 228 **Hemophilin sequesters a pool of heme and makes it available to *H. haemolyticus* but not to the** 229 **related species NTHi**

230 *H. haemolyticus* is unable to synthesise porphyrin and must acquire heme from the environment  
231 (Norskov-Lauritsen, 2014). Therefore, we hypothesised that hemophilin might function as part of a  
232 heme uptake pathway. To investigate this idea, we compared the growth of BW1 and the  
233 hemophilin knockout strain under different heme supplementation regimes. BW1 that was  
234 propagated in heme-replete TSB media, continued to grow when heme supplementation was  
235 withdrawn (Fig. 5A), presumably due to accumulation of heme or porphyrin stores under prior  
236 heme-replete conditions, consistent with previous reports (Mason et al., 2011; Vogel et al., 2012).  
237 After a 14-hour conditioning period in heme-deficient TSB media, BW1 now showed a strong  
238 dependence on heme supplementation for growth (Fig. 5B and Supplementary Fig. 14). In contrast,  
239 after conditioning in heme-replete TSB, the hemophilin knockout strain showed poor growth at all  
240 heme concentrations (Fig. 5C), and this was exacerbated after heme starvation (Fig. 5D), whereas  
241 the strain could be propagated for long periods on blood-supplemented media (not shown). These  
242 results suggest that the hemophilin knockout strain has a reduced capacity to utilise free heme.

243

244 To test directly if hemophilin can deliver heme to *H. haemolyticus*, we grew cultures supplemented  
245 with heme or holo hemophilin at matching final molar concentrations. When BW1 was initially  
246 cultured with growth-limiting concentrations of heme ( $0.6 \mu\text{g mL}^{-1}$ ), subsequent addition of holo  
247 hemophilin resulted in approximately 3-fold increase in culture density at 20 hours (Supplementary  
248 Fig. 15). This growth was the same as growth on an equivalent amount of free heme  
249 (Supplementary Fig. 15), suggesting that hemophilin-bound heme was readily available to BW1. In  
250 contrast, the addition of holo hemophilin to NTHi caused a decrease in growth (approximately 2-

251 fold decrease in cell density at 20 hours; Supplementary Fig. 15). Moreover, we found that the  
252 inhibition of NTHi in the agar well diffusion assay was overcome by addition of excess heme  
253 (Supplementary Fig. 16). Together, these results suggest that hemophilin binds heme in a form that  
254 can be utilised by *H. haemolyticus* BW1, but is not accessible to NTHi, and that inhibition of NTHi  
255 occurs by heme starvation.  
256

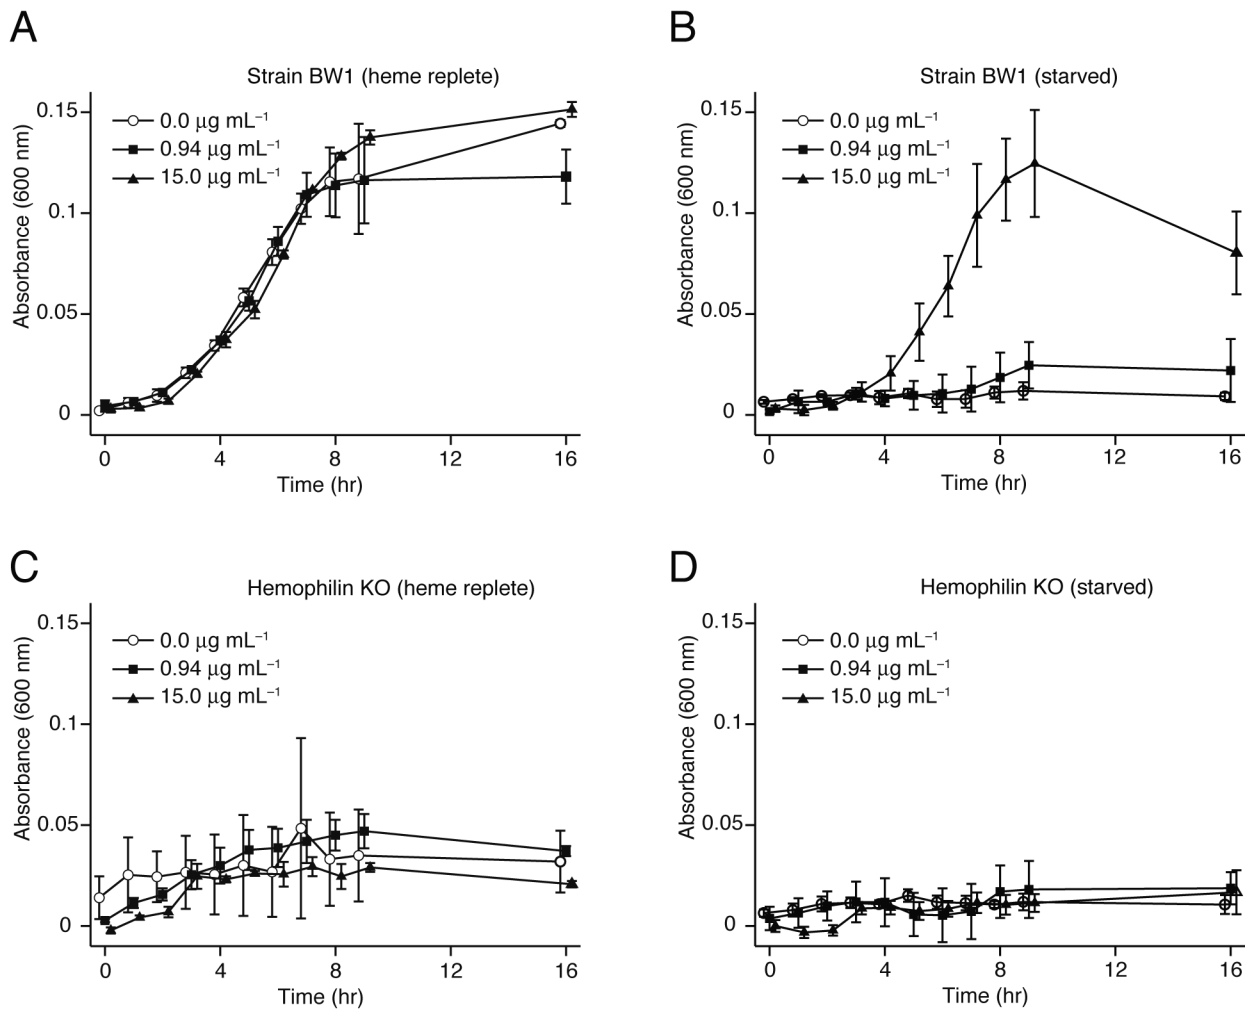

257  
258 **Fig. 5. A hemophilin gene knockout strain of BW1 has defects in heme utilisation.** Heme-replete and  
259 heme-starved populations of *H. haemolyticus* strain BW1 (A, B) or the hemophilin knockout strain (C, D)  
260 were inoculated into medium containing varying concentrations of heme as indicated. Error bars represent  $\pm 1$   
261 SD (n=3).

### 262 263 **Distribution of hemophilin across *H. haemolyticus* strains**

264 To gain insight into the broader biological significance of hemophilin, we searched the public  
265 sequence databases. From 46 complete or draft *H. haemolyticus* genomes available in Genbank, 30  
266 genomes contained an ORF with 67–100% nucleotide sequence identity to BW1 hemophilin

267 (Supplementary Table 4). In addition, 18 *H. influenzae* genomes (from a total of 700 genome  
268 assemblies), 3 *H. quentini* genomes (from a total of 3 assemblies), 1 *H. parainfluenzae* genome  
269 (from a total of 40 assemblies) encoded an ORF with similarity to BW1 hemophilin. In each case,  
270 the hemophilin gene was immediately downstream of a predicted TonB dependent transporter  
271 (Supplementary Table 4). Across the 25 unique hemophilin-like sequences encoded by all genomes,  
272 amino acid differences overwhelmingly mapped to surface exposed sites and surface loops on the  
273 hemophilin structure (Supplementary Fig. 17). Residues surrounding the heme ligand, including the  
274 heme coordinating His119 and the distal pocket residues Gln74, Met79 and Arg82 were 100%  
275 conserved in all hemophilin variants, indicating that heme binding is preserved in all variants. In  
276 summary, hemophilin homologues are present in a large proportion (63%) of *H. haemolyticus*  
277 genomes, compared to a small minority (<3%) of *H. influenzae* genomes, making hemophilin a  
278 distinctive feature of *H. haemolyticus* (and also *H. quentini*). Biochemical and genetic studies are  
279 now needed to establish if/how hemophilin alleles from the different phylogenetic groups contribute  
280 to heme uptake in these strains.

281

282 The observation that over half of published *H. haemolyticus* genomes carry a hemophilin-like gene  
283 raises the question of why only two NTHi-inhibitory strains (BW1 and RHH122) were identified in  
284 our functional screen. To start to investigate this question, we searched our collection of 100 *H.*  
285 *haemolyticus* clinical isolates for ORFs that were highly similar to BW1 hemophilin by real-time  
286 PCR and DNA sequencing (Supplementary Table 5). By real-time PCR, 15 isolates were positive;  
287 this primer set would theoretically have produced an amplicon for 7 of the 46 public *H.*  
288 *haemolyticus* genomes; the same 15% hit rate. We found 6 isolates, including BW1 and RHH122,  
289 with ORFs that were 100% identical, and found that the NTHi-inhibitory activity recovered from  
290 these isolates varied considerably (Supplementary Table 5). This suggests that high-level  
291 production of hemophilin is an unusual feature of BW1/RHH122 and emphasises the importance of  
292 understanding how hemophilin expression is regulated, in addition to the effects of sequence  
293 variation within the hemophilin protein.

294

295

## 296 **Discussion**

### 297 *Hemophilin is a previously undescribed hemophore in H. haemolyticus*

298 In a screen for potential probiotic strains of *H. haemolyticus* that produce inhibitors of NTHi, we  
299 identified hemophilin, a small soluble heme binding protein that is secreted at high levels by two *H.*

300 *haemolyticus* isolates, BW1 and RHH122. Our data suggest that hemophilin plays a positive role in  
301 heme acquisition in *H. haemolyticus*, and that the inhibition of NTHi, a pathogenic microorganism  
302 that shares a similar ecological niche in the upper respiratory tract of humans, is likely to involve  
303 competition for nutrient heme.

304

305 *H. influenzae* and *H. haemolyticus* lack the enzymes for *de novo* porphyrin synthesis and depend for  
306 their survival on scavenging heme, or protoporphyrin IX plus iron, from the host (Norskov-  
307 Lauritsen, 2014). *H. influenzae* have multiple pathways to scavenge heme (Hariadi et al., 2015)  
308 (Supplementary Table 4); in each pathway the initial heme binding step is performed by a  
309 membrane anchored protein or TonB-dependent outer membrane heme transporter. By comparison,  
310 hemophilin represents a previously unidentified mechanism in *Haemophilus* spp.—that is, secretion  
311 of a diffusible heme binding protein (a hemophore) into the surrounding environment. Hemophores  
312 are found in a subset of bacterial species. In Gram-positive species, hemophores can be recognised  
313 by the presence of one or more heme-binding NEAT (near iron transporter) domains; these  
314 proteins are covalently attached to the cell surface peptidoglycan, or S-layer, or secreted into the  
315 environment (Mazmanian et al., 2000; Grigg et al., 2007; Maresso et al., 2008; Tarlovsky et al.,  
316 2010; Malmirchegini et al., 2014). In Gram-negative organisms, three hemophores have been  
317 described: HasA from *Serratia marcescens*, *Pseudomonas* spp., and *Yersinia* spp. (Ghigo et al.,  
318 1997; Izadi et al., 1997; Ochsner et al., 2000; Rossi et al., 2001); HmuY from *Porphyromonas*  
319 *gingivalis* (Wojtowicz et al., 2009a); and HusA from *P. gingivalis* (Gao et al., 2018). Hemophilin,  
320 HasA, HmuY, HusA and NEAT domains have different folds, suggesting that hemophore functions  
321 have been independently acquired on multiple occasions in evolution.

322

323 Heme coordination by a single His side chain, as seen in hemophilin, is unusual for extracellular  
324 heme transport proteins, although it is common for heme proteins in general. Known hemophores  
325 make 5-coordinate heme complexes through Tyr (Grigg et al., 2007; Kumar et al., 2013; Kanadani  
326 et al., 2015) or 6-coordinate complexes via His/His (Wojtowicz et al., 2009a), Tyr/His (Arnoux et  
327 al., 1999), Tyr/Met (Gaudin et al., 2011), or Met/Met (Ran et al., 2007) ligands. Ligand  
328 combinations that include Tyr strongly favour binding to ferric over ferrous heme (Reedy et al.,  
329 2008), which is appropriate in the typically oxidising environment of the extracellular milieu. Heme  
330 ligation through a His ligand would potentially allow hemophilin to capture ferric or ferrous heme,  
331 as may occur in aerobic or near anaerobic extracellular environments; similar activity has been  
332 attributed to hemophores with His/His (Wojtowicz et al., 2009b) or Met/Met (Nygaard et al., 2006)  
333 ligands.

334

335 ***The heme-site structure suggests hemophilin could bind small molecule ligands in vivo***

336 Notably, hemophilin forms stable complexes with ferrous and ferric heme ligands (Supplementary  
337 Figs. 4, 5, 12). The fact that hemophilin purifies from *E. coli* with an O<sub>2</sub> ligand suggests a  
338 potentially biologically meaningful O<sub>2</sub> affinity and resistance to autooxidation. The exclusion of  
339 water from the proximal face of the heme and the small size and enclosed nature of the distal pocket  
340 are consistent with this (Carver et al., 1992). Such ligand binding has not been reported for other  
341 hemophores, although CO-adducts of the HasA hemophore can be prepared by reduction under  
342 pure CO atmosphere (Lukat-Rodgers et al., 2008; Ozaki et al., 2014). The chloride ion present as a  
343 heme ligand in the hemophilin crystal structure is not likely to be of physiological importance but  
344 indicates a strong propensity to bind to anionic ligands in the ferric state. A chloride ligand has been  
345 observed in crystal structures of only four heme proteins, including hemophilin (Kuwada et al.,  
346 2011; Singh et al., 2012; Kumar et al., 2013); these proteins have unrelated folds, but all have a  
347 similarly positioned Arg side chain in the distal heme pocket (Supplementary Fig. 12). Numerous  
348 bacteria heme proteins that act as gas sensors have been described (Martinkova et al., 2013), and  
349 because small ligands such as CO, NO and HS<sup>-</sup> have signalling roles at the host-bacteria interface  
350 (Toliver-Kinsky et al., 2019), ligand binding by hemophilin could be biologically important,  
351 although this remains to be investigated.

352

353 ***Proteins with structural similarity to hemophilin bind diverse ligands***

354 The small group of proteins that share structural similarity with hemophilin includes hemoglobin-  
355 haptoglobin utilisation protein (HpuA) (Wong et al., 2015), complement factor H binding protein  
356 (fHbp) (Schneider et al., 2009) and *Neisseria* heparin binding antigen (NHBA) (Wong et al., 2015),  
357 found in members of the *Neisseriaceae*, and transferrin binding protein B (TbpB) (Moraes et al.,  
358 2009), which is found in *Neisseriaceae* and some members of the *Pasteurellaceae*, including *H.*  
359 *influenzae* and *H. haemolyticus* (identifiable by BLAST search). HpuA, fHbp, HNBA and TbpB are  
360 lipid anchored in the bacterial outer membrane and have functions in iron uptake, immune evasion  
361 or surface attachment. Remarkably, the precise combination of β-barrel topology (8 strands in a  
362 meander topology with a shear value of 8) together with hydrophobic residues packed in the barrel  
363 core seems to occur only in this group of bacterial proteins (Supplementary Fig. 6).

364

365 The hemophores HasA, HmuY and HusA, as well as HpuA and TbpB, deliver cargo to their  
366 respective TonB-dependent outer membrane heme transporters (HasR, HmuR, HusR, HpuB and

367 TbpA) (Krieg et al., 2009; Noinaj et al., 2012) that are expressed from the same operon. It was  
368 therefore expected that a gene encoding a transporter should be found at a locus close to hemophilin  
369 and, indeed, a predicted TonB-dependent transporter with previously uncharacterised function  
370 occurs immediately upstream of the hemophilin gene in all 52 published genomes containing a  
371 hemophilin gene sequence (Supplementary Table 4). Molecular modelling using the PHYRE and I-  
372 TASSER web servers confidently predicts that the putative hemophilin receptor has a 22-strand  $\beta$ -  
373 barrel and plug structure with similarity to TbpA and HasR (Supplementary Fig. 18).

374

### 375 ***Hemophilin* genes are prevalent amongst strains of *H. haemolyticus*, but not *H. influenzae***

376 A question arises as to why hemophilin-like genes are common in *H. haemolyticus*, yet extremely  
377 rare in *H. influenzae*, given the similar requirement for heme and the close phylogenetic  
378 relationship between these species. Part of the answer might lie in the different combinations of  
379 heme uptake genes in *H. haemolyticus* and *H. influenzae* genomes. *H. influenzae*, and particularly  
380 NTHi, have enormous genetic diversity due to their intrinsic transformability and the high rate of  
381 recombination with exogenous DNA from their environment (Mell et al., 2011), such that less than  
382 50% of ORFs are present in all strains (the core genome) while the remainder are present variably  
383 and represent an accessory genome (Garmendia et al., 2012; De Chiara et al., 2014). In a group of  
384 88 *H. influenzae* genome assemblies (NTHi and Hib) (Pinto et al., 2018), 100% of strains have  
385 genes for the outer membrane heme transporters, *hup* and *hemR*, as well as the *hxuCBA* genes for  
386 heme uptake from hemopexin (Supplementary Table 4). In addition, 98% of strains have at least 1  
387 gene encoding a transporter for heme uptake from hemoglobin/haptoglobin (*hgpA*, *hgpB*, *hgpC*).  
388 Thus, the majority of these *H. influenzae* strains have highly redundant pathways for accessing  
389 heme from a variety of host sources. The number of heme acquisition genes found in *H.*  
390 *haemolyticus* strains is much more variable. From the 46 available *H. haemolyticus* assemblies,  
391 70% have *hup*, only 7% have *hemR*, and 87% have at least 1 gene for *hgpA/hgpB/hgpC*. Notably,  
392 no *H. haemolyticus* strains carry the *huxCBA* system, which is considered a virulence factor in *H.*  
393 *influenzae* (Morton et al., 2007). Similarly, diagnostic PCR screens performed on large collections  
394 of isolates have also shown much lower prevalence of *hup*, *hemR*, and *hxuCBA* genes in *H.*  
395 *haemolyticus* compared to NTHi (Hariadi et al., 2015). On balance then, *H. haemolyticus* have  
396 fewer heme uptake pathways than *H. influenzae*, which may have created stronger selective  
397 pressure for *H. haemolyticus* to acquire a hemophore. In this context, finding hemophilin-like genes  
398 in 63% of *H. haemolyticus* genome assemblies suggests hemophilin may be of considerable  
399 importance in the overall heme economy of this species.



400

401 ***By scavenging heme, hemophilin might be a mechanism of exploitative competition between***  
402 ***Haemophilus species***

403 We undertook our initial search for strains of *H. haemolyticus* that could inhibit NTHi with the goal  
404 of developing respiratory tract probiotics. The paradigm on which we based this search was that  
405 some bacterial strains produce bacteriocins to kill other species that share the same ecological niche  
406 (Ghequire et al., 2017; White et al., 2017). The fact that we identified hemophilin, a putative  
407 hemophore, suggests that sequestering heme might be another mechanism for bacteria to inhibit  
408 their neighbors. Competition for iron (Parrow et al., 2013) and heme (Mozzi et al., 2018) between  
409 bacterial pathogens and their hosts is well accepted, and the ability of the host to impose low  
410 concentrations of free iron is one of the most important forms of nutritional immunity (Parrow et al.,  
411 2013). The emerging picture is that non-pathogenic probiotic bacteria, as well as pathogenic species,  
412 have enhanced iron uptake capabilities that facilitate inhibition of microbial pathogens as well as  
413 colonisation of the host (Deriu et al., 2013). Our work suggests that competition for heme between  
414 heme auxotrophs, such as *Haemophilus* spp, might be similarly important.

415

416 Hemophilin is a previously unrecognised heme uptake mechanism in *H. haemolyticus* with the  
417 potential to block uptake of essential heme by pathogenic NTHi. Since *H. haemolyticus* co-  
418 colonises the upper respiratory tract with NTHi and competes for binding sites on epithelial cells  
419 (Pickering et al., 2016), *H. haemolyticus* strains with high-level expression of particular hemophilin  
420 alleles, as seen in the BW1 and RHH122, might starve NTHi of heme and locally and specifically  
421 inhibit NTHi colonisation.

422

423

424 **Materials and Methods**

425 **Bacterial collection and culture**

426 The origin and method of identification of the bacterial strains has been described previously  
427 (Latham et al., 2017). For revival, subculturing, and enumeration of *Haemophilus* spp., chocolate  
428 agar (CA) was used and incubated for 18–24 h at 35°C in an atmosphere of 5–10% CO<sub>2</sub>. Isolates  
429 were stored at –80°C in 10% w/v sterile skim milk media (SMM).

430 **Preparation of heme solutions**

431 Solutions (1–5 mg mL<sup>-1</sup>) of ferriprotoporphyrin IX were prepared fresh by dissolution in 0.1 M  
432 sodium hydroxide of either bovine hemin chloride (ferriprotoporphyrin IX chloride, Frontier

433 Scientific), or porcine hematin (ferriprotoporphyrin IX hydroxide, Sigma-Aldrich) solid, as  
434 specified in sections of Materials and Methods. Unless otherwise specified, the term heme is used  
435 generically throughout the main text for simplicity, irrespective of the source or oxidation state.

436

### 437 **Agar well diffusion assay**

438 The agar well diffusion assay was performed as described previously (Latham et al., 2017), with the  
439 following clarifications. Solid media consisted of 18.5 g L<sup>-1</sup> brain heart infusion (Oxoid) solidified  
440 with 7.5 g L<sup>-1</sup> Bacteriological Agar (Oxoid), autoclaved at 121°C for 30 min, cooled to 50°C, then  
441 supplemented with 1% (v/v) resuspended Vitox® (Oxoid), along with 7.5 mg L<sup>-1</sup> each of NAD and  
442 hematin (Oxoid); these media components are at half the normal concentration typically used for  
443 the culture of *Haemophilus influenzae*. 10 mL of agar was dispensed to a 90-mm Petri dish.  
444 Indicator strains (NTHi strain NCTC 4560 or NCTC 11315) were prepared by growing for 6–12 h  
445 on CA then suspended in Dulbecco's phosphate buffered saline (DPBS, Gibco) to an absorbance of  
446 1.0, diluting 10-fold with SMM and stored as 100-μL aliquots at -80°C. Thawed aliquots were  
447 diluted 100-fold in DPBS and mixed with 5 mL of molten overlay media at a dose predetermined to  
448 produce a dense lawn of colonies and immediately poured onto a petri dish of base media. 5-mm  
449 diameter circular holes were cut in the agar using a sterile stainless steel cork borer to accept 20–25  
450 μL of test solutions. Plates were left open in a biological safety cabinet for one hour until wells  
451 were free of liquid then incubated for 18–24 h at 35°C in a humidified atmosphere containing 5%  
452 CO<sub>2</sub> and the annular radius of cleared zones was recorded. Clearing zone size was affected by  
453 media age (older media giving larger the zone sizes), such that treatments were only compared  
454 within the same plate.

455

### 456 **Production of native hemophilin**

457 Media for hemophilin production was cold filterable tryptone soya broth (TSB; Oxoid) made to the  
458 manufacturer specifications and sterilised by filtration through membrane with a pore size of 0.2  
459 μm, then supplemented with HTM supplement (Oxoid) and Vitox® (Oxoid) according to  
460 manufacturers specification. Cultures of BW1 or RHH122 were grown on CA for 12–16 hours,  
461 suspended in pre-warmed (37°C) broth in a baffled shakeflask to an absorbance of 0.05 (OD600),  
462 then incubated with 200 RPM agitation at 37°C for 24 hours. Culture broths were clarified by  
463 centrifugation at 7000 × g for 30 minutes. Hemophilin activity was enriched by ammonium sulfate  
464 precipitation at 4°C, with the 50–70% saturation cut collected and redissolved in a volume of PBS  
465 equal to 1/20th of the initial culture broth volume then dialysed using a 3500-Da molecular weight

466 cut off (MWCO) dialysis membrane (ThermoFisher) for 24 hours at 4°C against 50 mM Tris-HCl,  
467 pH 7.5. Following concentration by ultrafiltration with a 10-kDa MWCO centrifugal filter unit  
468 (Merck-Millipore) the samples were separated over a Superose 12 HR 10/300 GL column (GE  
469 Healthcare) with a bed volume of 24 mL, in 0.15 M sodium phosphate buffer, pH 7.0. Fractions  
470 with peak activity were applied to a C<sub>4</sub> reversed-phase HPLC column (Symmetry300; Waters  
471 Corporation) that was developed with a linear gradient of 5–95% CH<sub>3</sub>CN, 95–5% H<sub>2</sub>O, 0.1%  
472 trifluoroacetic acid. Fractions were collected manually and lyophilised, then resuspended in  
473 aqueous buffer of choice.

474

#### 475 **RP-HPLC and mass spectrometry**

476 RP-HPLC fractions from the *H. haemolyticus* isolates BW1 or RHH122 that had peak hemophilin  
477 activity, or time/volume matched samples from control isolates, were subject to trypsin digestion in  
478 batch, or were processed further by Tris-tricine SDS-PAGE, silver staining and in-gel trypsin  
479 digestion of individual stained bands, as specified in Results. Silver stain was removed using 30  
480 mM potassium ferricyanide and 100 mM sodium thiosulfate (1:1 mix) and gel pieces were dried by  
481 vacuum centrifugation. In-gel trypsin digestion was performed using proteomic grade trypsin  
482 (Sigma) as previously described (Wilson et al., 2008). For trypsin digest of HPLC fractions,  
483 samples were precipitated in 9 volumes of ethanol, then reduced, alkylated and digested in 100 mM  
484 ammonium bicarbonate buffer as previously described (Wilson et al., 2008). Peptide samples were  
485 reconstituted in 20 µL HPLC Buffer (2% CH<sub>3</sub>CN, 0.05% trifluoroacetic acid) and analyzed by  
486 nanoLC-MS/MS using an Ultimate 3000 RSLCnano HPLC and LTQ-Orbitrap XL fitted with  
487 nanospray Flex ion source (ThermoFisher Scientific). Tryptic peptides were loaded at 0.05 mL min<sup>-1</sup>  
488 onto a C<sub>18</sub> 20 mm × 75 mm PepMap 100 trapping column then separated on an analytical C<sub>18</sub> 150  
489 mm × 75 mm PepMap 100 column nano-column. Peptides were eluted in a gradient from 98%  
490 buffer A (0.01% formic acid in water) to 40% buffer B (0.08% formic acid in 80% CH<sub>3</sub>CN and  
491 20% water) followed by washing in 99% buffer B (2 mins) and reequilibration in 98% buffer A for  
492 15 mins. The LTQ-Orbitrap XL was controlled using Xcalibur 2.1 software (ThermoFisher  
493 Scientific) and operated in data-dependent acquisition mode where survey scans were acquired in  
494 the Orbitrap using a resolving power of 60,000 (at 400 m/z). MS/MS spectra were concurrently  
495 acquired in the LTQ mass analyzer on the eight most intense ions from the FT survey scan. Charge  
496 state filtering, where unassigned and singly-charged precursor ions were not selected for  
497 fragmentation, and dynamic exclusion (repeat count 1, repeat duration 30 sec, exclusion list size  
498 500) were used. Fragmentation conditions in the LTQ were: 35% normalized collision energy,

499 activation  $q$  of 0.25, 30-ms activation time and minimum ion selection intensity of 500 counts. The  
500 mass spectrometry data have been deposited to the ProteomeXchange Consortium via the PRIDE  
501 (Perez-Riverol et al., 2019) partner repository with the dataset identifier PXD013687. Raw MS/MS  
502 spectra were searched against a *H. haemolyticus* database downloaded from NCBI on Sept 19<sup>th</sup>  
503 2016 (37, 881 entries) using the Andromeda search engine in the MaxQuant software (version  
504 1.5.1.2). The settings for protein identification by Orbitrap MS/MS included carbamidomethyl  
505 modification of cysteine and variable methionine oxidation, two missed trypsin cleavage allowed,  
506 mass error tolerances of 20 ppm then 4.5 ppm for initial and main peptide searches, respectively,  
507 0.5 Da tolerance for fragment ions. A false discovery rate of 0.01 was used for both peptide-  
508 spectrum matches and protein identification. PMF analysis of whole RP-HPLC fractions identified  
509 EGT80255 peptides as the most abundant ions in samples with NTHi-inhibitory activity obtained  
510 from BW1 and RHH122, whereas MS analysis of matched RP-HPLC fractions from control strains,  
511 BW29 and BWOCT3, did not identify EGT80255 peptides above background (normalised intensity  
512 < 1%). No peptides corresponding to the first 22 amino acids of hemophilin/EGT80255 were  
513 identified in gel slices or RP-HPLC fractions. A non-tryptic cleavage site between residues 22 and  
514 23 coincided with a signal peptide cleavage site predicted by SIGNALP 4.1 (Bendtsen et al., 2004).  
515 Information from the MaxQuant output is compiled in Supplementary Table 5.

516

### 517 **Recombinant hemophilin**

518 Genomic DNA was extracted from *H. haemolyticus* strain BW1. Primers NIS-F1 (5'-  
519 ATTACATATGCAGGTAGTGGGAAATGTATCA-3') and NIS-R1 (5'-  
520 TTATCTCGAGTTAATTTTAGTACCGCCAAA-3') were used to amplify a DNA fragment  
521 corresponding to the hemophilin ORF residues 23–272 (missing the predicted signal peptide). The  
522 hemophilin(23–272) fragment was cloned into the NdeI/XhoI sites of pET28a to express  
523 hemophilin with an N-terminal hexahistidine tag. A N-terminal truncated version of hemophilin,  
524 hemophilin(55–272), was similarly constructed by PCR cloning with primers NIS-F2 5'-  
525 ATTACATATGGACAGTAGTATTCCTAATGAT-3' and NIS-R1. H89Q and H119Q mutants  
526 were generated by standard overlap PCR using the NIS-F1 and NIS-R1 primers together with NIS-  
527 89Q-F 5'-TGGATTTCACAGCTTACAGG-3'; NIS-89Q-R 5'-CCTGTAAGCTGTGAAATCC-3';  
528 NIS-119Q-F 5'-GCCAGATCAGCGTGGCTTAGG-3'; NIS-119Q-R 5'-  
529 CCTAAGCCACGCTGATCTGGC-3'. Sequenced clones were transformed into *E. coli* strain  
530 Rossetta-2 (Novagen), grown in lysogeny broth (LB-Miller) containing 34  $\mu\text{g mL}^{-1}$   
531 chloramphenicol and 25  $\mu\text{g mL}^{-1}$  kanamycin; expression was induced with 1 mM isopropyl  $\beta$ -D-1-

532 thiogalactopyranoside for 3 hours with shaking at 37°C. Hemophilin(23–272) and hemophilin(55–  
533 272) expressed and purified in similar yield; however, the 55–272 deletion variant showed no  
534 NTHi-inhibitory activity and was not explored further. For hemophilin produced for  
535 crystallography, hemin chloride (5 µM final) was added to expression cultures one hour after  
536 induction. Bacterial cell pellets were collected by centrifugation, resuspended in lysis buffer (0.3 M  
537 NaCl, 0.05 M sodium phosphate, 0.02 M imidazole, 100 µM phenylmethylsulfonyl fluoride, pH  
538 7.2), lysed by sonication, and clarified by centrifugation. Ni-affinity resin (Gold Biotechnology or  
539 Invitrogen) chromatography was performed by gravity at 4°C. The Ni-affinity column was  
540 developed with step-wise isocratic gradients increased from 0.02 to 0.25 M imidazole. Peak  
541 hemophilin fractions were dialysed against buffer at 4°C (0.3 M NaCl, 0.025 M Tris·HCl, 0.02 M  
542 imidazole, pH 8.0 at 21°C). The His-tag was cleaved by digestion with thrombin (Sigma-Aldrich)  
543 in the presence of 2 mM CaCl<sub>2</sub> at 37°C for 2 hours; the His-tag was then removed by passing the  
544 sample over a second Ni-affinity column. Samples were dialysed at 4°C against 0.02 M sodium  
545 phosphate, pH 7, for loading onto cation exchange. Apo (colourless) and holo (orange-red) protein  
546 fractions of hemophilin were obtained by cation exchange (UnoS, BioRad), developed with a linear  
547 gradient: 0–0.2 M NaCl, 0.02–0.05 M sodium phosphate, pH 7. It was noted that repeated  
548 chromatographic separations of the holo protein by Ni-affinity, cation exchange, or SEC (Superose  
549 12 HR 10/300 GL column; GE Healthcare) did not lead to detectible loss of heme, leading us to  
550 conclude that apo and holo pools of hemophilin protein were present in *E. coli* during expression  
551 and following cell lysis. Heme could be removed from holo hemophilin by acid acetone extraction  
552 using the method of Ascoli et al. (Ascoli et al., 1981) or by RP-HPLC (Fig. 2B), to yield apo  
553 hemophilin. Apo hemophilin produced by unfolding/refolding had NTHi-inhibitory and heme  
554 binding properties indistinguishable from the properties of apo protein derived from *E. coli* lysates.  
555 The concentration of apo hemophilin was determined by spectrophotometry using an extinction  
556 coefficient,  $\epsilon_{280} = 25.9 \times 10^3 \text{ M}^{-1} \text{ cm}^{-1}$  at 280 nm wavelength, calculated from amino acid  
557 composition. The concentration of the holo protein was determined using an extinction coefficient,  
558  $\epsilon_{280} = 38.6 \pm 3.6 \times 10^3 \text{ M}^{-1} \text{ cm}^{-1}$  at 280 nm determined from area under the curve analysis of RP-  
559 HPLC chromatograms of apo and holo hemophilin performed in triplicate. The ~10% error in  
560 concentration measurements for the holo protein were below the detection limit in SDS-PAGE  
561 comparison of apo and holo samples (e.g., Fig. 2D).

562

563 **BW1 hemophilin Knockout**

564 To confirm the role of hemophilin in generating the anti-NTHi activity of strain BW1, an NIS  
565 knockout was constructed using insertional inactivation. A partially assembled WGS of *H.*  
566 *haemolyticus* strain 11P18 (Seq ID: LCTK01000015, contig 00016) was used to acquire sequence  
567 flanking the hemophilin ORF for PCR primer design. These PCR primers, NIS-KO-F  
568 (gctagacgtgctgatgtt) and NIS-KO-R (tgtgtgtctgtcgtgttg) were then used to generate a 1691 bp  
569 fragment using genomic DNA from strain BW1 as template. This 1691 bp fragment containing the  
570 hemophilin ORF (bp 700–1518) and a unique *Bsp*TI site was cloned in to pGEM-T (Promega)  
571 according to the manufacturer's instructions. An 1132 bp kanamycin resistance cassette, generated  
572 by PCR with *Bsp*TI tagged primers Kana-Bsp-F (5'-GCGCCTTAAGTAAACCTGAACCAA-3')  
573 and Kana-Bsp-R (5'-GCGCCTTAAGGTCGTCAGTCATAAA-3') using pLS88 (Genbank L23118)  
574 as template, was then sub-cloned into the *Bsp*TI site using standard methods. The hemophilin ORF  
575 containing the kanamycin cassette was then PCR amplified using NIS-KO-F and NIS-KO-R  
576 primers and transformed into strain BW1 using the MIV method (Herriott et al., 1970).  
577 Transformants were selected on CA supplemented with 50 mg L<sup>-1</sup> kanamycin and confirmed by  
578 sequencing of the hemophilin region. Sequence verified transformants were tested for the NTHi  
579 inhibitory phenotype using an ammonium sulfate extract of a broth culture in a well diffusion assay  
580 as previously described (Latham et al., 2017).

581

## 582 **UV-visible spectroscopy**

583 UV-visible spectra were recorded on a Jasco V-630 spectrophotometer fitted with a temperature-  
584 controlled sample holder (Jasco) and a septum sealed spectrosil quartz cuvette with a path length of  
585 1.0 cm (Starna, Baulkham Hills, Australia). Samples were prepared at final protein concentration 5–  
586 7  $\mu$ M in 0.1 M sodium phosphate, pH 7.0, unless otherwise stated. Solutions of heme were prepared  
587 fresh by dissolving hemin chloride (Frontier Scientific) to a concentration of  $\sim$ 1 mM in 0.1 M  
588 NaOH; for chloride/fluoride binding experiments, hematin was used in place of hemin chloride.  
589 Solutions were filtered through a PVDF membrane with a pore size of 0.45  $\mu$ m (Millipore) and  
590 concentrations were determined spectrophotometrically using an extinction coefficient  $\epsilon_{280} = 58.4 \times$   
591  $10^3 \text{ M}^{-1} \text{ cm}^{-1}$  in 0.1 M NaOH (Dawson et al., 1969). Ferrous heme was prepared by dilution of  
592 heme into nitrogen-purged buffer with addition of molar excess of sodium dithionite; the formation  
593 of ferrous heme was monitored spectrophotometrically. All liquid transfer steps were performed  
594 under positive N<sub>2</sub> pressure using a gas-tight syringe (SGE Analytical Science). O<sub>2</sub> and CO adducts  
595 of holo hemophilin were formed by bubbleing O<sub>2</sub>/CO gas. Ferric ligands, CN<sup>-</sup>, HS<sup>-</sup>, Cl<sup>-</sup>, F<sup>-</sup> were  
596 supplied as solutions of KCN, Na<sub>2</sub>S, NaCl and NaF, respectively.

597

## 598 **CD spectropolarimetry**

599 For CD, protein samples were exchanged to 25 mM sodium phosphate, 125 mM NaF, pH 7.0 by  
600 SEC over a 24-mL Superose 12 column. Samples were prepared at protein concentration 2.8–3.2  
601  $\mu\text{M}$  in a spectrosil quartz cuvette with a path-length of 0.1 cm (Starna). CD spectra were recorded  
602 on a Jasco model J-720 spectropolarimeter with a 450-W water-cooled xenon lamp over the spectral  
603 range 260–190 nm; the high tension voltage remained  $< 450$  V. Data acquisition and processing  
604 was performed in Spectra Manager Version 1.54.03 with the following acquisition parameters:  
605 number of accumulations, 5; bandwidth, 1 nm; response rate, 0.5 s; scan speed  $50 \text{ nm min}^{-1}$ ; data  
606 pitch 0.5 nm; baseline corrections were performed by subtracting the spectra obtained from  
607 matched buffer samples. Prior to sample measurements, the CD amplitude was checked, and if  
608 necessary calibrated, using a freshly made solution 1S-(+)-10-camphorsulphonic acid (CSA).

609

## 610 **Crystallography and structure analysis**

611 For crystallization, hemophilin was concentrated to  $45 \text{ mg mL}^{-1}$  in a buffer comprising 30 mM  
612 sodium phosphate, 70 mM NaCl, pH 7.3. Hexagonal crystals with distinct orange-red colour were  
613 grown by hanging drop method at  $18^\circ\text{C}$  in 0.1 M sodium acetate trihydrate pH 4.5, 2 M ammonium  
614 sulfate, by addition of 1  $\mu\text{L}$  of protein solution to 1  $\mu\text{L}$  of mother liquor. Crystals were  
615 cryoprotected in 25% glycerol before being flash cooled in liquid nitrogen. Diffraction data sets  
616 were collected at the Macromolecular Crystallography MX2 beamline, Australian Synchrotron  
617 (Clayton, Australia) (McPhillips et al., 2002) at a temperature of 100 K using x-ray wavelengths of  
618  $1.45866 \text{ \AA}$  to a resolution of  $2.1 \text{ \AA}$  and  $0.95372 \text{ \AA}$  to a resolution of  $1.6 \text{ \AA}$ . Crystal diffraction  
619 images were processed in XDS (Kabsch, 2010), and data were indexed, scaled and merged using the  
620 program AIMLESS in the CCP4 package (Winn et al., 2011). Diffraction data collected at  $1.45866 \text{ \AA}$   
621 ( $8.49986 \text{ keV}$ ) were phased by single-wavelength anomalous dispersion (Hendrickson and Teeter,  
622 1981) from the heme iron (above the K-edge, which is  $7.1120 \text{ KeV}$ ) using the PHASER SAD  
623 pipeline in CCP4, with solvent density modification implemented using PARROT (McCoy et al.,  
624 2007; Cowtan, 2010). Automated model building was performed using the BUCCANEER pipeline  
625 (Cowtan, 2012) in CCP4, followed by iterative rounds of manual building in COOT (Emsley and  
626 Cowtan, 2004) and refinement with REFMAC5 (Murshudov et al., 2011). The heavy heme iron atom  
627 was subject to anisotropic  $B$ -factor refinement; all other atoms were refined with isotropic  $B$ -  
628 factors. Peaks in the anomalous maps were identified at the following atom positions, in order of  
629 intensity (peak height/r.m.s): heme Fe ( $138 \sigma$ ), Met171 S ( $23.4 \sigma$ ), Met236 S ( $23.4 \sigma$ ), Fe-

630 coordinating Cl (19.8  $\sigma$ ), Met61 S (18.4  $\sigma$ ), Met98 S (16.7  $\sigma$ ), Met4 S (10.7  $\sigma$ ), Met91 S (10.7  $\sigma$ ),  
631 SO<sub>4</sub> (8.8  $\sigma$ ), SO<sub>4</sub> (8.7  $\sigma$ ), Met88 S (9.3  $\sigma$ ), SO<sub>4</sub> (8.8  $\sigma$ ), Cl (7.6  $\sigma$ ). The anomalous scattering  
632 coefficient,  $f''$ , for Fe, Cl, S at 8.5 KeV is 2.9, 0.63 and 0.50, respectively. Initial models built with  
633 the low-resolution data and reflections for  $R_{\text{free}}$  calculation (5% of data) were transferred as input  
634 for refinement against the 1.6-Å data in REFMAC5. Error estimates for bond length measurements  
635 around the heme iron were calculated from Cruickshanks diffraction-data precision indicator  
636 (Cruickshank, 1999) multiplied by  $2^{1/2}$  to convert from average coordinate error to bond length  
637 error. The volume of the heme-binding cavity was calculated by CASTP (Tian et al., 2018) and  
638 solvent accessible areas were determined using NACCESS (Hubbard and Thornton, 1993), based on a  
639 1.4 Å probe radius.

#### 640 641 **Propagation of *H. haemolyticus* in growth-limiting heme conditions**

642 Isolates were propagated from SMM stock, followed by two overnight passages on CA at 35°C  
643 with 5-10% CO<sub>2</sub> prior to experimental manipulation. Exposure to non-growth conditions was  
644 minimised by maintaining suspensions and diluents at 37°C in heat block with sand or benchtop  
645 incubator. A suspension (~1.0 OD<sub>600</sub>) of BW1 and BW1-KNOCKOUT was made in TSB from 8-10  
646 h growth on chocolate agar. This suspension was diluted 1:10 in 5mL pre-warmed TSB  
647 supplemented (sTSB) with 2% (v/v) Vitox® (Oxoid), and either 15 or 0 mg mL<sup>-1</sup> porcine hematin  
648 (Sigma-Aldrich) to generate heme-replete and heme-starved populations, respectively. Broths were  
649 incubated for 14 h at 37°C aerobically without shaking. Resultant starved and replete suspensions  
650 were centrifuged at 3000g for 10 min at 37°C and resuspended in fresh, pre-warmed TSB to an  
651 OD<sub>600</sub> of 0.5. A 1:10 dilution was made in pre-warmed TSB containing vitox and either 0, 0.94 or  
652 15 mg mL<sup>-1</sup> porcine hematin and incubated in a benchtop incubator at 37°C and 220 RPM. Colony  
653 counts were performed on all suspensions to confirm initial viability. The OD<sub>600</sub> was measured by  
654 aliquoting 100 mL of growth into wells of a 96-well plate (Grenier Bio-One) and measured in a  
655 plate reader (Infinite 200 PRO, Tecan Life Sciences).

#### 656 657 **Detection and sequencing of hemophilin in clinical isolates**

658 Genbank sequences from *H. haemolyticus* strains M19107 (AFQN01000044.1) and M28486  
659 (CP031238: region 316000-318200) were aligned and used to design RT-PCR primers to detect  
660 hemophilin in genomic DNA from our collection of 100 *H. haemolyticus* isolates using a method as  
661 previously described (Latham et al., 2015). Primers NIS-F 5'-  
662 GGCGTTGAGATATATGACAGTAG-3' and NIS-R 5'-TGTAAGGTGTGAAATCCATTTATCG-



663 3' were used to screen for hemophilin and generated a 126 bp amplicon from position 148 to 273 of  
664 the ORF. Primers SEQF 5'-AATCCAGTATTAGTTGTTGATGC-3' and SEQR 5'-  
665 CTTGGTTGTTTATTGTTAATGTAG-3' were used for amplifying and sequencing hemophilin and  
666 generated an amplicon of 1056 bp that included regions 237 bp upstream and 223 bp downstream of  
667 the ORF.

668

### 669 **Data availability**

670 The mass spectrometry data have been deposited to the ProteomeXchange Consortium via the  
671 PRIDE (Perez-Riverol et al., 2019) partner repository with the dataset identifier PXD013687. X-ray  
672 crystallography data have been deposited on the Protein Data Bank with pdb accession 6om5.

673

674

### 675 **Acknowledgements**

676 This work was funded in part by a grant from the Clifford Craig Foundation, Launceston, Tasmania  
677 (Grant #170). This research was undertaken in part using the MX2 beamline at the Australian  
678 Synchrotron, part of ANSTO, and made use of the Australian Cancer Research Foundation (ACRF)  
679 detector.

680

681

### 682 **References**

683 Arnoux P, Haser R, Izadi N, Lecroisey A, Delepierre M, Wandersman C and Czjzek M (1999) The  
684 crystal structure of HasA, a hemophore secreted by *Serratia marcescens*. *Nat Struct Biol* 6(6): 516-  
685 20.

686

687 Ascoli F, Fanelli MR and Antonini E (1981) Preparation and properties of apohemoglobin and  
688 reconstituted hemoglobins. *Methods Enzymol* 76: 72-87.

689

690 Bendtsen JD, Nielsen H, von Heijne G and Brunak S (2004) Improved prediction of signal peptides:  
691 SignalP 3.0. *J Mol Biol* 340(4): 783-95.

692

693 Carver TE, Brantley RE, Jr., Singleton EW, Arduini RM, Quillin ML, Phillips GN, Jr. and Olson JS  
694 (1992) A novel site-directed mutant of myoglobin with an unusually high O<sub>2</sub> affinity and low  
695 autooxidation rate. *J Biol Chem* 267(20): 14443-50.

696

697 Cerquetti M and Giufre M (2016) Why we need a vaccine for non-typeable *Haemophilus influenzae*.  
698 *Hum Vaccin Immunother* 12(9): 2357-61.

699

700 Cowtan K (2010) Recent developments in classical density modification. *Acta Crystallogr D Biol*  
701 *Crystallogr* 66(Pt 4): 470-8.

702

- 703 Cowtan K (2012) Completion of autobuilt protein models using a database of protein fragments.  
704 *Acta Crystallogr D Biol Crystallogr* 68(Pt 4): 328-35.  
705
- 706 Cruickshank DW (1999) Remarks about protein structure precision. *Acta Crystallogr D Biol*  
707 *Crystallogr* 55(Pt 3): 583-601.  
708
- 709 Dawson RMC, Elliott DC, Elliott WH and Jones KM (1969) *Data for biochemical research*,  
710 Oxford: Clarendon Press.  
711
- 712 De Chiara M, Hood D, Muzzi A, Pickard DJ, Perkins T, Pizza M, Dougan G, Rappuoli R, Moxon  
713 ER, Soriani M et al. (2014) Genome sequencing of disease and carriage isolates of nontypeable  
714 *Haemophilus influenzae* identifies discrete population structure. *Proc Natl Acad Sci U S A* 111(14):  
715 5439-44.  
716
- 717 Deriu E, Liu JZ, Pezeshki M, Edwards RA, Ochoa RJ, Contreras H, Libby SJ, Fang FC and  
718 Raffatellu M (2013) Probiotic bacteria reduce *salmonella typhimurium* intestinal colonization by  
719 competing for iron. *Cell Host Microbe* 14(1): 26-37.  
720
- 721 Di Pierro F, Colombo M, Giuliani MG, Danza ML, Basile I, Bollani T, Conti AM, Zanvit A and  
722 Rottoli AS (2016) Effect of administration of *Streptococcus salivarius* K12 on the occurrence of  
723 streptococcal pharyngo-tonsillitis, scarlet fever and acute otitis media in 3 years old children. *Eur*  
724 *Rev Med Pharmacol Sci* 20(21): 4601-4606.  
725
- 726 Emsley P and Cowtan K (2004) Coot: model-building tools for molecular graphics. *Acta*  
727 *Crystallogr D Biol Crystallogr* 60(Pt 12 Pt 1): 2126-32.  
728
- 729 Gao JL, Kwan AH, Yammine A, Zhou X, Trehwella J, Hugar BM, Collins DAT, Horne J, Ye P,  
730 Harty D et al. (2018) Structural properties of a haemophore facilitate targeted elimination of the  
731 pathogen *Porphyromonas gingivalis*. *Nat Commun* 9(1): 4097.  
732
- 733 Garmendia J, Marti-Llitas P, Moleres J, Puig C and Bengoechea JA (2012) Genotypic and  
734 phenotypic diversity of the noncapsulated *Haemophilus influenzae*: adaptation and pathogenesis in  
735 the human airways. *Int Microbiol* 15(4): 159-72.  
736
- 737 Gaudin CFM, Grigg JC, Arrieta AL and Murphy MEP (2011) Unique Heme-Iron Coordination by  
738 the Hemoglobin Receptor IsdB of *Staphylococcus aureus*. *Biochemistry* 50(24): 5443-52.  
739
- 740 Ghequire MG, Kemland L, Anoz-Carbonell E, Buchanan SK and De Mot R (2017) A Natural  
741 Chimeric *Pseudomonas* Bacteriocin with Novel Pore-Forming Activity Parasitizes the Ferrichrome  
742 Transporter. *MBio* 8(1): e01961-16.  
743
- 744 Ghigo JM, Letoffe S and Wandersman C (1997) A new type of hemophore-dependent heme  
745 acquisition system of *Serratia marcescens* reconstituted in *Escherichia coli*. *J Bacteriol* 179(11):  
746 3572-9.  
747
- 748 Grigg JC, Vermeiren CL, Heinrichs DE and Murphy ME (2007) Heme recognition by a  
749 *Staphylococcus aureus* NEAT domain. *Mol Microbiol* 63(1): 139-49.  
750

- 751 Hariadi NI, Zhang L, Patel M, Sandstedt SA, Davis GS, Marrs CF and Gilsdorf JR (2015)  
752 Comparative Profile of Heme Acquisition Genes in Disease-Causing and Colonizing Nontypeable  
753 *Haemophilus influenzae* and *Haemophilus haemolyticus*. *J Clin Microbiol* 53(7): 2132-7.  
754
- 755 Hendrickson WA and Teeter MM (1981) Structure of the hydrophobic protein crambin determined  
756 directly from the anomalous scattering of sulphur. *Nature* 290(5802): 107-113.  
757
- 758 Herriott RM, Meyer EM and Vogt M (1970) Defined nongrowth media for stage II development of  
759 competence in *Haemophilus influenzae*. *J Bacteriol* 101(2): 517-24.  
760
- 761 Hubbard SJ and Thornton JM (1993) NACCESS. London: Department of Biochemistry and  
762 Molecular Biology, University College London.  
763
- 764 Izadi N, Henry Y, Haladjian J, Goldberg ME, Wandersman C, Delepierre M and Lecroisey A  
765 (1997) Purification and characterization of an extracellular heme-binding protein, HasA, involved  
766 in heme iron acquisition. *Biochemistry* 36(23): 7050-7.  
767
- 768 Kabsch W (2010) XDS. *Acta Crystallogr D Biol Crystallogr* 66(Pt 2): 125-32.  
769
- 770 Kanadani M, Sato T, Hino T, Nagano S and Ozaki S (2015) The crystal structure of heme  
771 acquisition system A from *Yersinia pseudotuberculosis* (HasA<sub>ypt</sub>): Roles of the axial ligand Tyr75  
772 and two distal arginines in heme binding. *J Inorg Biochem* 151: 26-33.  
773
- 774 Krieg S, Huche F, Diederichs K, Izadi-Pruneyre N, Lecroisey A, Wandersman C, Delepelaire P and  
775 Welte W (2009) Heme uptake across the outer membrane as revealed by crystal structures of the  
776 receptor-hemophore complex. *Proc Natl Acad Sci U S A* 106(4): 1045-50.  
777
- 778 Kumar K, Woo SM, Siu T, Cortopassi WA, Duarte F and Paton RS (2018) Cation-pi interactions in  
779 protein-ligand binding: theory and data-mining reveal different roles for lysine and arginine. *Chem*  
780 *Sci* 9(10): 2655-2665.  
781
- 782 Kumar R, Lovell S, Matsumura H, Battaile KP, Moenne-Loccoz P and Rivera M (2013) The  
783 hemophore HasA from *Yersinia pestis* (HasA<sub>yp</sub>) coordinates hemin with a single residue, Tyr75,  
784 and with minimal conformational change. *Biochemistry* 52(16): 2705-7.  
785
- 786 Kuwada T, Hasegawa T, Takagi T, Sakae T, Sato I and Shishikura F (2011) Involvement of the  
787 distal Arg residue in Cl<sup>-</sup> binding of midge larval haemoglobin. *Acta Crystallogr D Biol Crystallogr*  
788 67(Pt 5): 488-95.  
789
- 790 Latham R, Zhang B and Tristram S (2015) Identifying *Haemophilus haemolyticus* and *Haemophilus*  
791 *influenzae* by SYBR Green real-time PCR. *Journal of Microbiological Methods* 112: 67-69.  
792
- 793 Latham RD, Gell DA, Fairbairn RL, Lyons AB, Shukla SD, Cho KY, Jones DA, Harkness NM and  
794 Tristram SG (2017) An isolate of *Haemophilus haemolyticus* produces a bacteriocin-like substance  
795 that inhibits the growth of nontypeable *Haemophilus influenzae*. *Int J Antimicrob Agents* 49(4):  
796 503-506.  
797
- 798 Lemon KP, Klepac-Ceraj V, Schiffer HK, Brodie EL, Lynch SV and Kolter R (2010) Comparative  
799 analyses of the bacterial microbiota of the human nostril and oropharynx. *MBio* 1(3): e00129-10.  
800

- 801 Lukat-Rodgers GS, Rodgers KR, Caillet-Saguy C, Izadi-Pruneyre N and Lecroisey A (2008) Novel  
802 heme ligand displacement by CO in the soluble hemophore HasA and its proximal ligand mutants:  
803 implications for heme uptake and release. *Biochemistry* 47(7): 2087-98.  
804
- 805 Malmirchegini GR, Sjodt M, Shnitkind S, Sawaya MR, Rosinski J, Newton SM, Klebba PE and  
806 Clubb RT (2014) Novel mechanism of hemin capture by Hbp2, the hemoglobin-binding hemophore  
807 from *Listeria monocytogenes*. *J Biol Chem* 289(50): 34886-99.  
808
- 809 Maresso AW, Garufi G and Schneewind O (2008) *Bacillus anthracis* secretes proteins that mediate  
810 heme acquisition from hemoglobin. *PLoS Pathog* 4(8): e1000132.  
811
- 812 Martinkova M, Kitanishi K and Shimizu T (2013) Heme-based globin-coupled oxygen sensors:  
813 linking oxygen binding to functional regulation of diguanylate cyclase, histidine kinase, and  
814 methyl-accepting chemotaxis. *J Biol Chem* 288(39): 27702-11.  
815
- 816 Mason KM, Raffel FK, Ray WC and Bakaletz LO (2011) Heme utilization by nontypeable  
817 *Haemophilus influenzae* is essential and dependent on Sap transporter function. *J Bacteriol* 193(10):  
818 2527-35.  
819
- 820 Mazmanian SK, Liu G, Jensen ER, Lenoy E and Schneewind O (2000) *Staphylococcus aureus*  
821 sortase mutants defective in the display of surface proteins and in the pathogenesis of animal  
822 infections. *Proc Natl Acad Sci U S A* 97(10): 5510-5.  
823
- 824 McCoy AJ, Grosse-Kunstleve RW, Adams PD, Winn MD, Storoni LC and Read RJ (2007) Phaser  
825 crystallographic software. *J Appl Crystallogr* 40(Pt 4): 658-674.  
826
- 827 McPhillips TM, McPhillips SE, Chiu HJ, Cohen AE, Deacon AM, Ellis PJ, Garman E, Gonzalez A,  
828 Sauter NK, Phizackerley RP et al. (2002) Blu-Ice and the Distributed Control System: software for  
829 data acquisition and instrument control at macromolecular crystallography beamlines. *J*  
830 *Synchrotron Radiat* 9(Pt 6): 401-6.  
831
- 832 Mell JC, Shumilina S, Hall IM and Redfield RJ (2011) Transformation of natural genetic variation  
833 into *Haemophilus influenzae* genomes. *PLoS Pathog* 7(7): e1002151.  
834
- 835 Moraes TF, Yu RH, Strynadka NC and Schryvers AB (2009) Insights into the bacterial transferrin  
836 receptor: the structure of transferrin-binding protein B from *Actinobacillus pleuropneumoniae*. *Mol*  
837 *Cell* 35(4): 523-33.  
838
- 839 Morton DJ, Seale TW, Madore LL, VanWagoner TM, Whitby PW and Stull TL (2007) The haem-  
840 haemopexin utilization gene cluster (*hxuCBA*) as a virulence factor of *Haemophilus influenzae*.  
841 *Microbiology* 153(Pt 1): 215-24.  
842
- 843 Mozzi A, Forni D, Clerici M, Cagliani R and Sironi M (2018) The Diversity of Mammalian  
844 Hemoproteins and Microbial Heme Scavengers Is Shaped by an Arms Race for Iron Piracy. *Front*  
845 *Immunol* 9: 2086.  
846
- 847 Murphy TF, Brauer AL, Sethi S, Kilian M, Cai X and Lesse AJ (2007) *Haemophilus haemolyticus*:  
848 a human respiratory tract commensal to be distinguished from *Haemophilus influenzae*. *J Infect Dis*  
849 195(1): 81-9.  
850

- 851 Murshudov GN, Skubak P, Lebedev AA, Pannu NS, Steiner RA, Nicholls RA, Winn MD, Long F  
852 and Vagin AA (2011) REFMAC5 for the refinement of macromolecular crystal structures. *Acta*  
853 *Crystallogr D Biol Crystallogr* 67(Pt 4): 355-67.  
854
- 855 Ngo CC, Massa HM, Thornton RB and Cripps AW (2016) Predominant Bacteria Detected from the  
856 Middle Ear Fluid of Children Experiencing Otitis Media: A Systematic Review. *PLoS One* 11(3):  
857 e0150949.  
858
- 859 Noinaj N, Easley NC, Oke M, Mizuno N, Gumbart J, Boura E, Steere AN, Zak O, Aisen P,  
860 Tajkhorshid E et al. (2012) Structural basis for iron piracy by pathogenic *Neisseria*. *Nature*  
861 483(7387): 53-8.  
862
- 863 Norskov-Lauritsen N (2014) Classification, identification, and clinical significance of *Haemophilus*  
864 and *Aggregatibacter* species with host specificity for humans. *Clin Microbiol Rev* 27(2): 214-40.  
865
- 866 Nygaard TK, Blouin GC, Liu M, Fukumura M, Olson JS, Fabian M, Dooley DM and Lei B (2006)  
867 The mechanism of direct heme transfer from the streptococcal cell surface protein Shp to HtsA of  
868 the HtsABC transporter. *J Biol Chem* 281(30): 20761-71.  
869
- 870 Ochsner UA, Johnson Z and Vasil ML (2000) Genetics and regulation of two distinct haem-uptake  
871 systems, phu and has, in *Pseudomonas aeruginosa*. *Microbiology* 146 ( Pt 1)(Pt 1): 185-98.  
872
- 873 Ozaki SI, Sato T, Sekine Y, Migita CT, Uchida T and Ishimori K (2014) Spectroscopic studies on  
874 HasA from *Yersinia pseudotuberculosis*. *J Inorg Biochem* 138: 31-38.  
875
- 876 Parrow NL, Fleming RE and Minnick MF (2013) Sequestration and scavenging of iron in infection.  
877 *Infect Immun* 81(10): 3503-14.  
878
- 879 Perez-Riverol Y, Csordas A, Bai J, Bernal-Llinares M, Hewapathirana S, Kundu DJ, Inuganti A,  
880 Griss J, Mayer G, Eisenacher M et al. (2019) The PRIDE database and related tools and resources  
881 in 2019: improving support for quantification data. *Nucleic Acids Res* 47(D1): D442-D450.  
882
- 883 Pickering JL, Prosser A, Corscadden KJ, de Gier C, Richmond PC, Zhang G, Thornton RB and  
884 Kirkham LA (2016) *Haemophilus haemolyticus* Interaction with Host Cells Is Different to  
885 Nontypeable *Haemophilus influenzae* and Prevents NTHi Association with Epithelial Cells. *Front*  
886 *Cell Infect Microbiol* 6: 50.  
887
- 888 Pinto M, Gonzalez-Diaz A, Machado MP, Duarte S, Vieira L, Carrico JA, Marti S, Bajanca-Lavado  
889 MP and Gomes JP (2018) Insights into the population structure and pan-genome of *Haemophilus*  
890 *influenzae*. *Infect Genet Evol* 67: 126-135.  
891
- 892 Ran Y, Zhu H, Liu M, Fabian M, Olson JS, Aranda Rt, Phillips GN, Jr., Dooley DM and Lei B  
893 (2007) Bis-methionine ligation to heme iron in the streptococcal cell surface protein Shp facilitates  
894 rapid heme transfer to HtsA of the HtsABC transporter. *J Biol Chem* 282(43): 31380-8.  
895
- 896 Reedy CJ, Elvekrog MM and Gibney BR (2008) Development of a heme protein structure-  
897 electrochemical function database. *Nucleic Acids Res* 36(Database issue): D307-13.  
898

- 899 Rossi MS, Fetherston JD, Letoffe S, Carniel E, Perry RD and Ghigo JM (2001) Identification and  
900 characterization of the hemophore-dependent heme acquisition system of *Yersinia pestis*. *Infect*  
901 *Immun* 69(11): 6707-17.  
902
- 903 Schneider MC, Prosser BE, Caesar JJ, Kugelberg E, Li S, Zhang Q, Quoraishi S, Lovett JE, Deane  
904 JE, Sim RB et al. (2009) *Neisseria meningitidis* recruits factor H using protein mimicry of host  
905 carbohydrates. *Nature* 458(7240): 890-3.  
906
- 907 Sethi S and Murphy TF (2008) Infection in the pathogenesis and course of chronic obstructive  
908 pulmonary disease. *N Engl J Med* 359(22): 2355-65.  
909
- 910 Singh R, Grigg JC, Armstrong Z, Murphy ME and Eltis LD (2012) Distal heme pocket residues of  
911 B-type dye-decolorizing peroxidase: arginine but not aspartate is essential for peroxidase activity. *J*  
912 *Biol Chem* 287(13): 10623-30.  
913
- 914 Smith LJ, Kahraman A and Thornton JM (2010) Heme proteins—diversity in structural  
915 characteristics, function, and folding. *Proteins* 78(10): 2349-68.  
916
- 917 Stivala A, Wybrow M, Wirth A, Whisstock JC and Stuckey PJ (2011) Automatic generation of  
918 protein structure cartoons with Pro-origami. *Bioinformatics* 27(23): 3315-6.  
919
- 920 Tarlovsky Y, Fabian M, Solomaha E, Honsa E, Olson JS and Maresso AW (2010) A *Bacillus*  
921 *anthracis* S-layer homology protein that binds heme and mediates heme delivery to IsdC. *J*  
922 *Bacteriol* 192(13): 3503-11.  
923
- 924 Tian W, Chen C, Lei X, Zhao J and Liang J (2018) CASTp 3.0: computed atlas of surface  
925 topography of proteins. *Nucleic Acids Res* 46(W1): W363-W367.  
926
- 927 Toliver-Kinsky T, Cui W, Toro G, Lee SJ, Shatalin K, Nudler E and Szabo C (2019) H2S, a  
928 Bacterial Defense Mechanism against the Host Immune Response. *Infect Immun* 87(1): doi:  
929 10.1128/IAI.00272-18.  
930
- 931 Tristram S, Jacobs MR and Appelbaum PC (2007) Antimicrobial resistance in *Haemophilus*  
932 *influenzae*. *Clin Microbiol Rev* 20(2): 368-89.  
933
- 934 Van Eldere J, Slack MP, Ladhani S and Cripps AW (2014) Non-typeable *Haemophilus influenzae*,  
935 an under-recognised pathogen. *Lancet Infect Dis* 14(12): 1281-92.  
936
- 937 Vogel AR, Szelestey BR, Raffel FK, Sharpe SW, Gearinger RL, Justice SS and Mason KM (2012)  
938 SapF-mediated heme-iron utilization enhances persistence and coordinates biofilm architecture of  
939 *Haemophilus*. *Front Cell Infect Microbiol* 2: 42.  
940
- 941 White P, Joshi A, Rassam P, Housden NG, Kaminska R, Goult JD, Redfield C, McCaughey LC,  
942 Walker D, Mohammed S et al. (2017) Exploitation of an iron transporter for bacterial protein  
943 antibiotic import. *Proc Natl Acad Sci U S A* 114(45): 12051-12056.  
944
- 945 Wilson R, Belluoccio D and Bateman JF (2008) Proteomic analysis of cartilage proteins. *Methods*  
946 45(1): 22-31.  
947

- 948 Winn MD, Ballard CC, Cowtan KD, Dodson EJ, Emsley P, Evans PR, Keegan RM, Krissinel EB,  
949 Leslie AG, McCoy A et al. (2011) Overview of the CCP4 suite and current developments. *Acta*  
950 *Crystallogr D Biol Crystallogr* 67(Pt 4): 235-42.  
951
- 952 Wojtowicz H, Guevara T, Tallant C, Olczak M, Sroka A, Potempa J, Sola M, Olczak T and Gomis-  
953 Ruth FX (2009a) Unique structure and stability of HmuY, a novel heme-binding protein of  
954 *Porphyromonas gingivalis*. *PLoS Pathog* 5(5): e1000419.  
955
- 956 Wojtowicz H, Wojaczynski J, Olczak M, Kroliczewski J, Latos-Grazynski L and Olczak T (2009b)  
957 Heme environment in HmuY, the heme-binding protein of *Porphyromonas gingivalis*. *Biochem*  
958 *Biophys Res Commun* 383(2): 178-82.  
959
- 960 Wong CT, Xu Y, Gupta A, Garnett JA, Matthews SJ and Hare SA (2015) Structural analysis of  
961 haemoglobin binding by HpuA from the *Neisseriaceae* family. *Nat Commun* 6: 10172.  
962
- 963 Zhang B, Kunde D and Tristram S (2014) *Haemophilus haemolyticus* is infrequently misidentified  
964 as *Haemophilus influenzae* in diagnostic specimens in Australia. *Diagn Microbiol Infect Dis* 80(4):  
965 272-3.  
966
- 967 Zipperer A, Konnerth MC, Laux C, Berscheid A, Janek D, Weidenmaier C, Burian M, Schilling  
968 NA, Slavetinsky C, Marschal M et al. (2016) Human commensals producing a novel antibiotic  
969 impair pathogen colonization. *Nature* 535(7613): 511-6.  
970  
971
